# Supplementary material for: Effect of stimulation time on the expression of human macrophage polarization markers
Source: PubMed Central journal article supplement (PMC8920204; doi:10.1371/journal.pone.0265196), 2022-03-14
Supplement: pone.0265196.s001.pdf [file pone.0265196.s001.pdf]

| M1          |       |        |     |              |       |      | M2a         |      |      |       |       |       | M2c         |       |       |             |
|-------------|-------|--------|-----|--------------|-------|------|-------------|------|------|-------|-------|-------|-------------|-------|-------|-------------|
|             | CXCL9 | CXCL10 | TNF | IL-1 $\beta$ | IL-12 | IDO1 |             | MRC1 | TGM2 | CCL17 | CCL22 | IL-10 |             | IL-10 | CD163 | TGF $\beta$ |
| US vs. 4h   | **    | ***    | *** | **           | **    | *    | US vs. 4h   | ***  | ***  | *     | ***   | ***   | US vs. 4h   | ***   | ***   | ns          |
| US vs. 8h   | ***   | ***    | *** | **           | ***   | **   | US vs. 8h   | ***  | **   | *     | ***   | ***   | US vs. 8h   | ***   | **    | ns          |
| US vs. 12h  | **    | **     | *** | ***          | ***   | ***  | US vs. 12h  | ***  | **   | *     | **    | ***   | US vs. 12h  | ns    | ***   | **          |
| US vs. 24h  | *     | **     | *** | *            | ns    | ns   | US vs. 24h  | ***  | ***  | *     | ***   | ***   | US vs. 24h  | **    | ***   | ns          |
| US vs. 48h  | **    | ***    | *** | **           | ***   | **   | US vs. 48h  | ***  | **   | *     | **    | ***   | US vs. 48h  | ***   | ***   | ***         |
| US vs. 72h  | *     | **     | *** | *            | *     | ***  | US vs. 72h  | ***  | **   | *     | ***   | ***   | US vs. 72h  | ***   | ***   | ***         |
| 4h vs. 8h   | **    | ***    | *** | ***          | ***   | **   | 4h vs. 8h   | ns   | ns   | ns    | ***   | ***   | 4h vs. 8h   | **    | ns    | ns          |
| 4h vs. 12h  | **    | ***    | *** | *            | ***   | **   | 4h vs. 12h  | *    | ns   | *     | **    | **    | 4h vs. 12h  | ***   | **    | *           |
| 4h vs. 24h  | **    | ***    | *** | ns           | **    | ns   | 4h vs. 24h  | ns   | ns   | **    | ***   | ***   | 4h vs. 24h  | ***   | ns    | ns          |
| 4h vs. 48h  | **    | ***    | *** | ns           | ns    | **   | 4h vs. 48h  | *    | ns   | ns    | **    | ***   | 4h vs. 48h  | ***   | **    | *           |
| 4h vs. 72h  | **    | ***    | *** | ***          | ns    | ***  | 4h vs. 72h  | ***  | *    | **    | ***   | ***   | 4h vs. 72h  | **    | ***   | ns          |
| 8h vs. 12h  | ***   | **     | *** | ns           | ns    | ns   | 8h vs. 12h  | ns   | *    | *     | *     | ns    | 8h vs. 12h  | ***   | ns    | ns          |
| 8h vs. 24h  | ***   | ***    | *** | ns           | **    | ns   | 8h vs. 24h  | ***  | *    | *     | ***   | ***   | 8h vs. 24h  | **    | ns    | ns          |
| 8h vs. 48h  | **    | ***    | *** | ns           | ***   | **   | 8h vs. 48h  | *    | ns   | ns    | **    | ***   | 8h vs. 48h  | ns    | *     | **          |
| 8h vs. 72h  | ***   | ***    | *** | *            | **    | ***  | 8h vs. 72h  | ***  | ***  | *     | **    | ***   | 8h vs. 72h  | ns    | *     | ns          |
| 12h vs. 24h | ns    | ns     | **  | ns           | *     | ns   | 12h vs. 24h | ***  | ns   | ns    | ***   | ***   | 12h vs. 24h | **    | **    | ns          |
| 12h vs. 48h | ns    | **     | ns  | ns           | **    | **   | 12h vs. 48h | *    | ns   | *     | **    | ***   | 12h vs. 48h | ***   | ***   | *           |
| 12h vs. 72h | **    | **     | *   | ns           | **    | ***  | 12h vs. 72h | ***  | **   | ns    | **    | ***   | 12h vs. 72h | *     | ***   | ns          |
| 24h vs. 48h | ns    | **     | *   | ns           | **    | *    | 24h vs. 48h | ***  | ns   | **    | *     | ***   | 24h vs. 48h | **    | ***   | *           |
| 24h vs. 72h | *     | **     | **  | ns           | *     | ***  | 24h vs. 72h | ***  | **   | ns    | **    | ns    | 24h vs. 72h | ns    | *     | ns          |
| 48h vs. 72h | *     | *      | *** | *            | ns    | ns   | 48h vs. 72h | ***  | **   | **    | ns    | ***   | 48h vs. 72h | ns    | ns    | ns          |
