# Supplementary material for: Effect of stimulation time on the expression of human macrophage polarization markers
Source: PubMed Central journal article supplement (PMC8920204; doi:10.1371/journal.pone.0265196), 2022-03-14
Supplement: pone.0265196.s002.pdf [file pone.0265196.s002.pdf]

| M1          |      |      |        | M2a         |        |       | M2c         |       |
|-------------|------|------|--------|-------------|--------|-------|-------------|-------|
|             | CD86 | CD64 | HLA-DR |             | CD200R | CD206 |             | CD163 |
| US vs. 4h   | ns   | ns   | ns     | US vs. 4h   | ns     | ns    | US vs. 4h   | ns    |
| US vs. 8h   | *    | **   | ns     | US vs. 8h   | *      | *     | US vs. 8h   | ns    |
| US vs. 12h  | *    | *    | *      | US vs. 12h  | *      | *     | US vs. 12h  | ns    |
| US vs. 24h  | ns   | *    | ns     | US vs. 24h  | *      | **    | US vs. 24h  | ns    |
| US vs. 48h  | ns   | *    | *      | US vs. 48h  | *      | *     | US vs. 48h  | ns    |
| US vs. 72h  | **   | *    | ns     | US vs. 72h  | *      | *     | US vs. 72h  | ns    |
| 4h vs. 8h   | **   | **   | ns     | 4h vs. 8h   | ns     | ns    | 4h vs. 8h   | *     |
| 4h vs. 12h  | *    | ns   | *      | 4h vs. 12h  | ns     | ns    | 4h vs. 12h  | *     |
| 4h vs. 24h  | ns   | *    | ns     | 4h vs. 24h  | *      | *     | 4h vs. 24h  | ns    |
| 4h vs. 48h  | *    | *    | ns     | 4h vs. 48h  | **     | *     | 4h vs. 48h  | ns    |
| 4h vs. 72h  | ns   | *    | ns     | 4h vs. 72h  | *      | *     | 4h vs. 72h  | ns    |
| 8h vs. 12h  | ns   | ns   | ns     | 8h vs. 12h  | *      | ns    | 8h vs. 12h  | ns    |
| 8h vs. 24h  | **   | ns   | *      | 8h vs. 24h  | *      | **    | 8h vs. 24h  | ns    |
| 8h vs. 48h  | *    | *    | *      | 8h vs. 48h  | **     | *     | 8h vs. 48h  | ns    |
| 8h vs. 72h  | ns   | *    | ns     | 8h vs. 72h  | *      | ns    | 8h vs. 72h  | ns    |
| 12h vs. 24h | *    | ns   | *      | 12h vs. 24h | ns     | **    | 12h vs. 24h | ns    |
| 12h vs. 48h | *    | *    | *      | 12h vs. 48h | **     | *     | 12h vs. 48h | ns    |
| 12h vs. 72h | ns   | *    | *      | 12h vs. 72h | *      | ns    | 12h vs. 72h | ns    |
| 24h vs. 48h | *    | ns   | ns     | 24h vs. 48h | ***    | ns    | 24h vs. 48h | ns    |
| 24h vs. 72h | *    | ns   | ns     | 24h vs. 72h | ns     | ns    | 24h vs. 72h | ns    |
| 48h vs. 72h | ns   | ns   | ns     | 48h vs. 72h | ns     | ns    | 48h vs. 72h | ns    |
