# Supplementary material for: Effect of stimulation time on the expression of human macrophage polarization markers
Source: PubMed Central journal article supplement (PMC8920204; doi:10.1371/journal.pone.0265196), 2022-03-14
Supplement: pone.0265196.s003.pdf [file pone.0265196.s003.pdf]

| M1          |         |     |             | M2a         |      | M2c         |             |
|-------------|---------|-----|-------------|-------------|------|-------------|-------------|
|             | IL12p70 | TNF | IL1 $\beta$ |             | IL10 |             | TGF $\beta$ |
| US vs. 4h   | ***     | *** | ns          | US vs. 4h   | **   | US vs. 4h   | ns          |
| US vs. 8h   | ***     | *** | *           | US vs. 8h   | **   | US vs. 8h   | ns          |
| US vs. 12h  | ***     | *** | *           | US vs. 12h  | **   | US vs. 12h  | -           |
| US vs. 24h  | ***     | *** | *           | US vs. 24h  | ns   | US vs. 24h  | ns          |
| US vs. 48h  | ***     | *** | ns          | US vs. 48h  | ***  | US vs. 48h  | ns          |
| US vs. 72h  | ***     | **  | ns          | US vs. 72h  | ***  | US vs. 72h  | **          |
| 4h vs. 8h   | ***     | *   | ns          | 4h vs. 8h   | -    | 4h vs. 8h   | ns          |
| 4h vs. 12h  | ***     | *   | *           | 4h vs. 12h  | -    | 4h vs. 12h  | ns          |
| 4h vs. 24h  | ***     | **  | *           | 4h vs. 24h  | ns   | 4h vs. 24h  | ns          |
| 4h vs. 48h  | ***     | *** | ns          | 4h vs. 48h  | ***  | 4h vs. 48h  | ns          |
| 4h vs. 72h  | ***     | *** | ns          | 4h vs. 72h  | ***  | 4h vs. 72h  | **          |
| 8h vs. 12h  | ***     | ns  | *           | 8h vs. 12h  | -    | 8h vs. 12h  | ns          |
| 8h vs. 24h  | *       | *** | ns          | 8h vs. 24h  | ns   | 8h vs. 24h  | ns          |
| 8h vs. 48h  | ns      | *** | ns          | 8h vs. 48h  | ***  | 8h vs. 48h  | ns          |
| 8h vs. 72h  | ns      | *** | ns          | 8h vs. 72h  | ***  | 8h vs. 72h  | **          |
| 12h vs. 24h | **      | **  | ns          | 12h vs. 24h | ns   | 12h vs. 24h | ns          |
| 12h vs. 48h | *       | *** | ns          | 12h vs. 48h | ***  | 12h vs. 48h | ns          |
| 12h vs. 72h | *       | *** | *           | 12h vs. 72h | ***  | 12h vs. 72h | **          |
| 24h vs. 48h | **      | *** | ns          | 24h vs. 48h | ***  | 24h vs. 48h | ns          |
| 24h vs. 72h | *       | *** | ns          | 24h vs. 72h | ***  | 24h vs. 72h | **          |
| 48h vs. 72h | ns      | ns  | ns          | 48h vs. 72h | ns   | 48h vs. 72h | **          |
